# Supplementary material
Source: publisher site journal article supplement (https://www.dovepress.com/article/332127)
Supplement: Supplementary file 1 [file get_supplementary_file.php]

**Table S1. The table of abbreviations.**

| Abbreviation |  |
| --- | --- |
| DW | distilled water |
| EDC | 1-(3-dimethylaminopropyl) -3-ethylcarbondiimide |
| F1 | PLGA-PEI-PEG@NAT |
| F2 | Gel@PLGA-PEI-PEG@NAT |
| F3 | PLGA-PEI-PEG |
| FITC | fluorescein isothiocyanate |
| PLGA | Poly(lactic-co-glycolic acid) |
| PEI | Poly(ethylene imine) |
| PEG | Polyethylene glycol |
| FTIR | fourier transform infrared spectroscopy |
| NS | normal saline |
| HCE-T | human corneal epithelial |
| MIC | minimum inhibitory concentration |
| NAT | natamycin |
| NPs | nanoparticles |
| NHS | N-hydroxysuccinimide |
| PBS | phosphate buffer saline |
| PLGA | poly(lactic-co-glycolic acid) |
| PEI | poly(ethylene imine) |
| PEG | polyethylene glycol |
| PDI | polymer dispersity index |
| SEM | scanning electron microscopy |
| TEM | transmission electron microscopy |
| UV | ultraviolet |

**Table S2. The formulae of the prepared.**

| **Prepared** | **Formulae** |
| --- | --- |
| PLGA | CH3(C3H3O2)x(C2H2O2)yCOOH |
| PEI | (CH2CH2NH)nNH2 |
| PEG | CH3(CH2CH2O)nCOOH |
| PLGA-PEI-PEG | CH3(C3H3O2)x(C2H2O2)yCO-HN(CH2CH2NH)nNH-CO(CH2CH2O)nCH3 |
